# Supplementary material for: Plant-Based Diet and Glycemic Control in Type 2 Diabetes: Evidence from a Thai Health-Promoting Hospital
Source: MDPI journal article supplement (doi:10.3390/nu16050619), 2024-02-23
Supplement: s1 [file s1]

## Supplemental Material: Plant-Based Diet and Glycemic Control in Type 2 Diabetes: Evidence from a Thai Health-Promoting Hospital.

Jonah B. Adokwe, Donrawee Waeyeng, Kanyamon Suwan, Kanchana Camsanit, Chanakan Kaiduong, Pawida Nuanrat, Phisit Pouyfung, Supabhorn Yimthiang, Jaruneth Petchoo, Soisungwan Satarug and Tanaporn Khamphaya

**Table S1:** Description of Controls and Participants with Type 2 Diabetes

| Parameters                | Non-diabetic controls <i>n</i> =74 | Participants with<br>Type 2 diabetes <i>n</i> =61 | <i>p</i> -value |
|---------------------------|------------------------------------|---------------------------------------------------|-----------------|
| <b>Education, n (%)</b>   |                                    |                                                   |                 |
| Primary School            | 50 (67.6)                          | 51 (83.6)                                         | 0.068           |
| Secondary School          | 18 (24.3)                          | 9 (14.8)                                          |                 |
| College/university        | 6 (8.10)                           | 1 (1.60)                                          |                 |
| <b>Occupation, n (%)</b>  |                                    |                                                   |                 |
| Unemployed                | 12 (16.2)                          | 11 (18.0)                                         | 0.067           |
| Merchant                  | 13 (17.6)                          | 20 (32.8)                                         |                 |
| Livestock worker          | 3 (4.10)                           | 2 (3.30)                                          |                 |
| Labourer                  | 14 (18.9)                          | 12 (19.7)                                         |                 |
| Fishnet knitter           | 10 (13.5)                          | 11 (18.0)                                         |                 |
| Farmer                    | 20 (27.0)                          | 5 (8.20)                                          |                 |
| <b>Income (THB/month)</b> |                                    |                                                   |                 |
| <9000                     | 46 (62.2)                          | 40 (65.6)                                         | 0.682           |
| ≥9000                     | 28 (37.8)                          | 21 (34.4)                                         |                 |
| <b>Exercise</b>           | 41 (55.4)                          | 31 (50.8)                                         | 0.595           |

**Table S2:** Average Consumption Rates of Plant Foods in Five Plant Food Categories.

| Parameter         | Average Food Consumption (g/kg b.w./day) |
|-------------------|------------------------------------------|
| <b>Total PFS</b>  |                                          |
| Low               | $4.45 \pm 0.31$                          |
| Medium            | $7.38 \pm 0.22$                          |
| High              | $10.65 \pm 0.49$                         |
| <b>Vegetables</b> |                                          |
| Low               | $0.24 \pm 0.04$                          |
| Medium            | $1.17 \pm 0.07$                          |
| High              | $2.36 \pm 0.13$                          |
| <b>Fruits</b>     |                                          |
| Low               | $0.39 \pm 0.08$                          |
| Medium            | $1.57 \pm 0.10$                          |
| High              | $3.27 \pm 0.35$                          |
| <b>Legumes</b>    |                                          |
| Low               | $0.11 \pm 0.03$                          |
| Medium            | $0.39 \pm 0.04$                          |
| High              | $0.98 \pm 0.13$                          |
| <b>Nut/Seeds</b>  |                                          |
| Low               | $0.00 \pm 0.00$                          |
| Medium            | $0.06 \pm 0.02$                          |
| High              | $0.25 \pm 0.04$                          |
| <b>Cereals</b>    |                                          |
| Low               | $3.10 \pm 0.24$                          |
| Medium            | $4.21 \pm 0.20$                          |
| High              | $5.44 \pm 0.26$                          |
